# Supplementary material
Source: PubMed Central journal article supplement (PMC1871858)
Supplement: pnas_0701266104_1.pdf [file pnas_0701266104_1.pdf]

Table 3. Variants discovered by resequencing all IRF5 exons and introns and 1 Kb upstream of exon 1A in 40 SLE cases and 8 controls from Sweden.

| Internal ID      | RS number <sup>*</sup> | Chromosome | Position <sup>†</sup> | MAF <sup>‡</sup> | Minor allele      | No. of chromosomes <sup>§</sup> | No. of chromosomes with minor allele | Description       |
|------------------|------------------------|------------|-----------------------|------------------|-------------------|---------------------------------|--------------------------------------|-------------------|
| UUmolmed_IRF5_01 | rs3757386              | 7          | 128,171,248           | 0.15/0.04        | T/G               | 46                              | 7/2                                  | Promoter          |
| UUmolmed_IRF5_02 | rs3757385              | 7          | 128,171,255           | 0.24             | A                 | 46                              | 11                                   | Promoter          |
| UUmolmed_IRF5_03 | rs3834330              | 7          | 128171273-5           | 0.16             | "TG" deletion     | 44                              | 7                                    | Promoter          |
| UUmolmed_IRF5_04 | rs3807134              | 7          | 128,171,289           | 0.15             | G                 | 46                              | 7                                    | Promoter          |
| UUmolmed_IRF5_05 | rs3807135              | 7          | 128,171,568           | 0.26             | A                 | 46                              | 12                                   | Promoter          |
| UUmolmed_IRF5_06 | rs6968563              | 7          | 128,171,682           | 0.04             | A                 | 46                              | 2                                    | Promoter          |
| UUmolmed_IRF5_07 |                        | 7          | 128,172,086           | 0.06             | G                 | 72                              | 4                                    | Promoter          |
| UUmolmed_IRF5_08 |                        | 7          | 128171882-7           | 0.37             | "GCCCC" insertion | 86                              | 32                                   | Promoter          |
| UUmolmed_IRF5_09 | rs6953165              | 7          | 128,172,161           | 0.04             | G                 | 28                              | 1                                    | Intron            |
| UUmolmed_IRF5_10 | rs2004640              | 7          | 128,172,252           | 0.49             | G                 | 90                              | 44                                   | Intron            |
| UUmolmed_IRF5_11 | rs3807307              | 7          | 128,173,153           | 0.46             | A                 | 46                              | 21                                   | Intron            |
| UUmolmed_IRF5_12 |                        | 7          | 128,173,233           | 0.01             | A                 | 76                              | 1                                    | Intron            |
| UUmolmed_IRF5_13 |                        | 7          | 128,173,283           | 0.01             | T                 | 76                              | 1                                    | Intron            |
| UUmolmed_IRF5_14 | rs752637               | 7          | 128,173,371           | 0.33             | A                 | 82                              | 27                                   | Intron            |
| UUmolmed_IRF5_15 | rs3823536              | 7          | 128,173,617           | 0.46             | T                 | 54                              | 25                                   | Intron            |
| UUmolmed_IRF5_16 | rs3778753              | 7          | 128,173,993           | 0.44             | A                 | 64                              | 28                                   | Intron            |
| UUmolmed_IRF5_17 | rs3778752              | 7          | 128,173,998           | 0.38             | G                 | 26                              | 10                                   | Intron            |
| UUmolmed_IRF5_18 | rs3778751              | 7          | 128,173,999           | 0.44             | T                 | 50                              | 22                                   | Intron            |
| UUmolmed_IRF5_19 |                        | 7          | 128,174,126           | 0.04             | C                 | 28                              | 1                                    | Intron            |
| UUmolmed_IRF5_20 |                        | 7          | 128,174,377           | 0.04             | C                 | 28                              | 1                                    | Intron            |
| UUmolmed_IRF5_21 | rs3807306              | 7          | 128,174,631           | 0.44             | C                 | 72                              | 32                                   | Intron            |
| UUmolmed_IRF5_22 | rs11767834             | 7          | 128,175,227           | 0.02             | A                 | 46                              | 1                                    | Intron            |
| UUmolmed_IRF5_23 |                        | 7          | 128,175,684           | 0.02             | A                 | 46                              | 1                                    | Intron            |
| UUmolmed_IRF5_24 |                        | 7          | 128,175,305           | 0.02             | C                 | 46                              | 1                                    | Intron            |
| UUmolmed_IRF5_25 |                        | 7          | 128,175,281           | 0.02             | G                 | 46                              | 1                                    | Intron            |
| UUmolmed_IRF5_26 | rs11761199             | 7          | 128,175,786           | 0.50             | G                 | 42                              | 21                                   | Intron            |
| UUmolmed_IRF5_27 |                        | 7          | 128,175,834           | 0.18             | A                 | 44                              | 8                                    | Intron            |
| UUmolmed_IRF5_28 |                        | 7          | 128,178,156           | 0.02             | G                 | 46                              | 1                                    | Intron            |
| UUmolmed_IRF5_29 | rs1874328              | 7          | 128,179,055           | 0.36             | G                 | 80                              | 29                                   | Intron            |
| UUmolmed_IRF5_30 | rs1874327              | 7          | 128,179,327           | 0.27             | A                 | 56                              | 15                                   | Intron            |
| UUmolmed_IRF5_31 |                        | 7          | 128,179,567           | 0.23             | C                 | 56                              | 13                                   | Intron            |
| UUmolmed_IRF5_32 |                        | 7          | 128,179,704           | 0.03             | A                 | 30                              | 1                                    | Intron            |
| UUmolmed_IRF5_33 |                        | 7          | 128,180,368           | 0.02             | A                 | 48                              | 1                                    | Intron            |
| UUmolmed_IRF5_34 |                        | 7          | 128,180,688           | 0.07             | A                 | 30                              | 2                                    | Intron            |
| UUmolmed_IRF5_35 |                        | 7          | 128181324-54          | 0.45             | 30nt deletion     | 76                              | 34                                   | In-frame deletion |
| UUmolmed_IRF5_36 |                        | 7          | 128182387-8           | 0.18             | "G" insertion     | 84                              | 15                                   | Intron            |
| UUmolmed_IRF5_37 | rs2070197              | 7          | 128,182,951           | 0.32             | G                 | 44                              | 14                                   | 3'UTR             |
| UUmolmed_IRF5_38 | rs10954213             | 7          | 128,183,378           | 0.24             | T                 | 50                              | 12                                   | 3'UTR             |
| UUmolmed_IRF5_39 | rs11770589             | 7          | 128,183,439           | 0.42             | C                 | 52                              | 22                                   | 3'UTR             |
| UUmolmed_IRF5_40 | rs10954214             | 7          | 128,183,584           | 0.24             | T                 | 34                              | 8                                    | 3'UTR             |

<sup>\*</sup> Number assigned to variant by dbSNP (<http://www.ncbi.nlm.nih.gov/entrez/query.fcgi?db=snp>).

<sup>†</sup> Position in the HG17 assembly of the Human Genome.

<sup>‡</sup> Minor Allele Frequency.

<sup>§</sup> Number of chromosomes with high quality data.
