# Supplementary material
Source: PubMed Central journal article supplement (PMC1871858)
Supplement: pnas_0701266104_2.pdf [file pnas_0701266104_2.pdf]

Table 4. Variants discovered by resequencing all *IRF5* exons and 1kb of upstream of exon 1A in 96 SLE cases from the USA.

| Internal ID    | RS number <sup>*</sup> | Chromosome | Position <sup>†</sup> | MAF <sup>‡</sup> | Minor Allele  | Total chromosomes <sup>§</sup> | Number of chromosomes with minor allele | Description       | Frequency in HapMap CEU |
|----------------|------------------------|------------|-----------------------|------------------|---------------|--------------------------------|-----------------------------------------|-------------------|-------------------------|
| Broad11429372  | rs3757388              | 7          | 128,169,974           | 0.27             | G             | 166                            | 44                                      | promoter          | failed_design           |
| Broad11429376  | rs4639458              | 7          | 128,170,037           | 0.42             | T             | 166                            | 69                                      | promoter          | failed_QC               |
| Broad11374596  |                        | 7          | 128,170,524           | 0.03             | A             | 176                            | 6                                       | promoter          |                         |
| Broad11374705  |                        | 7          | 128,170,965           | 0.01             | A             | 190                            | 2                                       | promoter          |                         |
| Broad11374729  |                        | 7          | 128,171,076           | 0.01             | A             | 190                            | 1                                       | promoter          |                         |
| Broad11374811  |                        | 7          | 128,171,232           | 0.02             | A             | 190                            | 3                                       | promoter          |                         |
| Broad11374827  | rs3757386              | 7          | 128,171,248           | 0.12/0.02        | T/G           | 192                            | 22/3                                    | promoter          | failed_design           |
| Broad11374834  | rs3757385              | 7          | 128,171,255           | 0.26             | T             | 184                            | 47                                      | promoter          | failed_design           |
| Broad11374851  | rs3840553              | 7          | 128,171,277           | 0.11             | A             | 188                            | 21                                      | promoter          | failed_QC               |
| Broad11374863  | rs3807134              | 7          | 128,171,289           | 0.12             | C             | 190                            | 23                                      | promoter          | failed_design           |
| Broad11374900  | rs3807135              | 7          | 128,171,568           | 0.27             | T             | 172                            | 46                                      | promoter          | 0.44                    |
| Broad11374958  | rs6968563              | 7          | 128,171,682           | 0.03             | C             | 164                            | 5                                       | promoter          | 0.05                    |
| Broad11374970  |                        | 7          | 128,171,699           | 0.01             | C             | 166                            | 1                                       | promoter          |                         |
| Broad11880969  |                        | 7          | 128,174,987           | 0.01             | T             | 190                            | 1                                       | intronic          |                         |
| Broad11880979  | rs3807305              | 7          | 128,175,084           | 0.01             | A             | 192                            | 2                                       | intronic          |                         |
| Broad11880984  |                        | 7          | 128,175,162           | 0.01             | G             | 192                            | 2                                       | intronic          |                         |
| Broad11375359  |                        | 7          | 128,179,704           | 0.01             | A             | 192                            | 2                                       | intronic          |                         |
| Broad11375713  |                        | 7          | 128,180,096           | 0.01             | A             | 192                            | 1                                       | intronic          |                         |
| Broad11375787  |                        | 7          | 128,180,663           | 0.01             | T             | 192                            | 1                                       | intronic          |                         |
| Broad11375788  |                        | 7          | 128,180,688           | 0.02             | A             | 192                            | 3                                       | intronic          | 0.01                    |
| Broad11376007  |                        | 7          | 128,180,986           | 0.01             | T             | 192                            | 1                                       | intronic          |                         |
| Exon6_Deletion |                        | 7          | 128,181,324-54        | 0.48             | 30nt deletion | 190                            | 92                                      | In-frame deletion | 0.48                    |
| Broad11376731  | rs2230117              | 7          | 128,181,996           | 0.01             | G             | 192                            | 1                                       | synonymous        | 0.00                    |
| Broad11376908  |                        | 7          | 128,182,399           | 0.13             | G             | 166                            | 22                                      | intronic          |                         |
| Broad11376919  |                        | 7          | 128,182,426           | 0.03             | A             | 174                            | 5                                       | intronic          | 0.04                    |
| Broad11376973  |                        | 7          | 128,182,546           | 0.02             | G             | 176                            | 4                                       | intronic          |                         |
| Broad11376984  |                        | 7          | 128,182,561           | 0.02             | G             | 192                            | 3                                       | intronic          | 0.02                    |
| Broad11376997  |                        | 7          | 128,182,579           | 0.01             | G             | 182                            | 1                                       | missense          |                         |
| Broad11377186  | rs2070197              | 7          | 128,182,951           | 0.18             | C             | 190                            | 35                                      | 3'UTR             | 0.17                    |
| Broad11377207  |                        | 7          | 128,182,978           | 0.01             | G             | 192                            | 1                                       | 3'UTR             |                         |
| Broad11377253  |                        | 7          | 128,183,044           | 0.02             | C             | 178                            | 4                                       | 3'UTR             | 0.00                    |
| Broad11377330  | rs10954213             | 7          | 128,183,378           | 0.36             | G             | 192                            | 69                                      | 3'UTR             | 0.46                    |
| Broad11377356  | rs11770589             | 7          | 128,183,439           | 0.40             | G             | 192                            | 77                                      | 3'UTR             | 0.38                    |
| Broad11377358  |                        | 7          | 128,183,459           | 0.01             | A             | 192                            | 1                                       | 3'UTR             |                         |
| Broad11429458  | rs10954214             | 7          | 128,183,584           | 0.22             | C             | 192                            | 43                                      | 3'UTR             | 0.42                    |
| Broad11429530  |                        | 7          | 128,184,089           | 0.01             | T             | 192                            | 1                                       | 3'UTR             |                         |

<sup>\*</sup> Number assigned to variant by dbSNP (<http://www.ncbi.nlm.nih.gov/entrez/query.fcgi?db=snp>).

<sup>†</sup> Position in the HG17 assembly of the Human Genome.

<sup>‡</sup> Minor Allele Frequency.

<sup>§</sup> Number of chromosomes with high quality data.
