# Supplementary material
Source: PubMed Central journal article supplement (PMC1871858)
Supplement: pnas_0701266104_3.pdf [file pnas_0701266104_3.pdf]

Table 5. Single marker transmission and conditional analyses in SLE trios from the US and UK

| Marker       | Position <sup>1</sup> | Allele <sup>2</sup> | T <sup>3</sup> | U <sup>3</sup> | T/U <sup>3</sup> | $\chi^2$ | $P^4$                | $P^5$ conditional on Group 1 variants (rs2070197) | $P$ conditional on Group 1 (rs2070197) and Group 2 (rs2004640) variants | $P$ conditional on Group 1 (rs2070197), Group 2 (rs2004640), and Group 3 (rs10954213) variants |
|--------------|-----------------------|---------------------|----------------|----------------|------------------|----------|----------------------|---------------------------------------------------|-------------------------------------------------------------------------|------------------------------------------------------------------------------------------------|
| rs7780972    | 128,113,113           | C                   | 88             | 73             | 1.2              | 1.4      | 0.237                | 0.03                                              | 0.14                                                                    | 0.25                                                                                           |
| rs9656375    | 128,115,191           | G                   | 213            | 210            | 1.0              | 0.0      | 0.884                | 0.87                                              | 0.65                                                                    | 0.58                                                                                           |
| rs4731523    | 128,124,227           | A                   | 241            | 211            | 1.1              | 2.0      | 0.158                | 0.36                                              | 0.32                                                                    | 0.40                                                                                           |
| rs6948542    | 128,141,463           | G                   | 184            | 166            | 1.1              | 0.9      | 0.336                | 0.29                                              | 0.27                                                                    | 0.37                                                                                           |
| rs1495461    | 128,145,691           | G                   | 260            | 220            | 1.2              | 3.3      | 0.068                | 0.37                                              | 0.59                                                                    | 0.45                                                                                           |
| rs960633     | 128,154,711           | T                   | 257            | 209            | 1.2              | 4.9      | 0.026                | 0.54                                              | 0.75                                                                    | 0.56                                                                                           |
| rs6968225    | 128,157,557           | G                   | 106            | 105            | 1.0              | 0.0      | 0.945                | 0.48                                              | 0.08                                                                    | 0.19                                                                                           |
| rs729302     | 128,162,910           | A                   | 270            | 195            | 1.4              | 12.1     | $5.0 \times 10^{-4}$ | 0.0024                                            | 0.56                                                                    | 0.82                                                                                           |
| rs4728142    | 128,167,917           | A                   | 363            | 257            | 1.4              | 18.1     | $2.1 \times 10^{-5}$ | 0.0054                                            | 0.0096                                                                  | 0.20                                                                                           |
| rs3807135    | 128,171,568           | C                   | 298            | 241            | 1.2              | 6.0      | 0.0141               | 0.28                                              | 0.0008                                                                  | 0.31                                                                                           |
| rs2004640    | 128,172,251           | T                   | 344            | 233            | 1.5              | 21.4     | $3.8 \times 10^{-6}$ | 0.0019                                            | -                                                                       | -                                                                                              |
| rs752637     | 128,173,371           | G                   | 297            | 238            | 1.2              | 6.5      | 0.011                | 0.28                                              | 0.0010                                                                  | 0.14                                                                                           |
| rs1874328    | 128,179,054           | T                   | 280            | 275            | 1.0              | 0.0      | 0.832                | 0.47                                              | 0.04                                                                    | 0.94                                                                                           |
| Exon 6 indel | 128,181,324-54        | A                   | 337            | 294            | 1.1              | 2.9      | 0.087                | 0.25                                              | 0.01                                                                    | NA                                                                                             |
| rs2070197    | 128,182,950           | C                   | 205            | 111            | 1.8              | 28.0     | $1.2 \times 10^{-7}$ | -                                                 | -                                                                       | -                                                                                              |
| rs10954213   | 128,183,377           | A                   | 282            | 226            | 1.2              | 6.2      | 0.013                | 0.14                                              | 0.0089                                                                  | -                                                                                              |
| rs11770589   | 128,183,438           | G                   | 338            | 288            | 1.2              | 4.0      | 0.046                | 0.16                                              | 0.01                                                                    | NA                                                                                             |
| rs10954214   | 128,183,583           | T                   | 281            | 232            | 1.2              | 4.7      | 0.031                | 0.14                                              | 0.02                                                                    | NA                                                                                             |
| rs10488630   | 128,187,899           | G                   | 280            | 263            | 1.1              | 0.5      | 0.466                | 0.42                                              | 0.11                                                                    | 0.90                                                                                           |
| rs10488631   | 128,188,133           | C                   | 223            | 125            | 1.8              | 27.6     | $1.5 \times 10^{-7}$ | 1.00                                              | NA <sup>6</sup>                                                         | NA                                                                                             |
| rs2280714    | 128,188,675           | A                   | 268            | 219            | 1.2              | 4.9      | 0.026                | 0.18                                              | 0.0078                                                                  | NA                                                                                             |
| rs3847098    | 128,189,099           | G                   | 211            | 199            | 1.1              | 0.4      | 0.553                | 0.28                                              | 0.06                                                                    | 0.83                                                                                           |
| rs11761242   | 128,189,556           | T                   | 25             | 20             | 1.3              | 0.6      | 0.456                | 0.03                                              | 0.06                                                                    | 0.06                                                                                           |
| rs12539741   | 128,190,755           | T                   | 222            | 125            | 1.8              | 27.1     | $1.9 \times 10^{-7}$ | 1.00                                              | NA                                                                      | NA                                                                                             |
| rs17166351   | 128,191,754           | C                   | 336            | 290            | 1.2              | 3.4      | 0.066                | 0.17                                              | 0.005                                                                   | NA                                                                                             |
| rs696612     | 128,192,475           | C                   | 153            | 124            | 1.2              | 3.0      | 0.081                | 0.0078                                            | 0.825                                                                   | 0.29                                                                                           |

<sup>1</sup> Position in the HG17 assembly of the Human Genome.<sup>2</sup> The overtransmitted allele.<sup>3</sup> Number of transmitted alleles (T), untransmitted alleles (U), and transmitted to untransmitted allele ratio (T/U).<sup>4</sup> Nominal  $P$  value for association to SLE.<sup>5</sup>  $P$  value for the association to SLE under the model that the indicated markers fully explain the association to SLE, as determined by conditional logistic regression.<sup>6</sup> NA indicates that the association to SLE cannot be calculated because it is statistically indistinguishable from the proposed model.
