# Supplementary material
Source: PubMed Central journal article supplement (PMC1871858)
Supplement: pnas_0701266104_4.pdf [file pnas_0701266104_4.pdf]

Table 6. Association with *IRF5* mRNA expression in transformed B cells from 210 samples from HapMap CEU, CHB, JPT and YRI populations.

| Variant     | Chromosome | Position <sup>‡</sup> | <i>P</i> <sup>†</sup>   |
|-------------|------------|-----------------------|-------------------------|
| rs7780972   | 7          | 128,113,113           | 0.66                    |
| rs4731523   | 7          | 128,124,227           | 0.45                    |
| rs6948542   | 7          | 128,141,463           | 0.90                    |
| rs1495461   | 7          | 128,145,691           | 0.57                    |
| rs960633    | 7          | 128,154,711           | 0.0036                  |
| rs6968225   | 7          | 128,157,557           | 6.0 x 10 <sup>-25</sup> |
| rs729302    | 7          | 128,162,910           | 0.0075                  |
| rs4728142   | 7          | 128,167,917           | 6.5 x 10 <sup>-21</sup> |
| rs2004640   | 7          | 128,172,251           | 4.2 x 10 <sup>-14</sup> |
| rs1874328   | 7          | 128,179,054           | 1.3 x 10 <sup>-22</sup> |
| Exon6 indel | 7          | 128,181,324           | 2.0 x 10 <sup>-31</sup> |
| rs2070197   | 7          | 128,182,950           | 8.7 x 10 <sup>-7</sup>  |
| rs10954213  | 7          | 128,183,377           | 3.5 x 10 <sup>-55</sup> |
| rs11770589  | 7          | 128,183,438           | 3.7 x 10 <sup>-33</sup> |
| rs10954214  | 7          | 128,183,583           | 1.7 x 10 <sup>-40</sup> |
| rs10488631  | 7          | 128,188,133           | 7.9 x 10 <sup>-7</sup>  |
| rs2280714   | 7          | 128,188,675           | 1.7 x 10 <sup>-40</sup> |
| rs3847098   | 7          | 128,189,099           | 2.0 x 10 <sup>-11</sup> |
| rs11761242  | 7          | 128,189,556           | 0.0011                  |
| rs12539741  | 7          | 128,190,755           | 2.1 x 10 <sup>-6</sup>  |
| rs17166351  | 7          | 128,191,754           | 7.4 x 10 <sup>-34</sup> |
| rs6966125   | 7          | 128,192,475           | 1.8 x 10 <sup>-24</sup> |

<sup>‡</sup> Position of variant in the HG17 assembly of the human genome.

<sup>†</sup> Association of variant to *IRF5* mRNA levels in 210 unrelated EBV-transformed B cell lines derived from the HapMap samples (GENEVAR dataset, [www.sanger.ac.uk/humgen/genevar/](http://www.sanger.ac.uk/humgen/genevar/)).
