# Supplementary material
Source: PubMed Central journal article supplement (PMC1871858)
Supplement: pnas_0701266104_5.pdf [file pnas_0701266104_5.pdf]

Table 7. Association of genotype with *IRF5* expression in 233 transformed B cell lines

| Marker     | Chromosome | Position <sup>*</sup> | Location               | MAF <sup>†</sup> | Nominal <i>P</i> <sup>‡</sup> | <i>P</i> conditional on rs10954213 <sup>§</sup> | <i>P</i> conditional on rs2004640 and rs10954213 <sup>¶</sup> |
|------------|------------|-----------------------|------------------------|------------------|-------------------------------|-------------------------------------------------|---------------------------------------------------------------|
| rs729302   | 7          | 128,162,911           | Promoter               | 0.32             | 0.02                          | 0.34                                            | 0.201                                                         |
| rs2004640  | 7          | 128,172,252           | Exon 1B splice site    | 0.49             | $1.9 \times 10^{-17}$         | 0.0016                                          | -                                                             |
| rs752637   | 7          | 128,173,371           | intron                 | 0.45             | $1.2 \times 10^{-9}$          | 0.11                                            | 0.809                                                         |
| rs2070197  | 7          | 128,182,951           | 3' UTR                 | 0.09             | 0.004                         | 0.74                                            | 0.649                                                         |
| rs10954213 | 7          | 128,183,378           | 3' UTR                 | 0.43             | $1.7 \times 10^{-38}$         | -                                               | -                                                             |
| rs11770589 | 7          | 128,183,439           | 3' UTR                 | 0.48             | $2.4 \times 10^{-25}$         | 1.00                                            | 0.487                                                         |
| rs10954214 | 7          | 128,183,584           | 3' UTR                 | 0.37             | $1.5 \times 10^{-34}$         | 0.0018                                          | NA <sup>  </sup>                                              |
| rs2280714  | 7          | 128,188,676           | 5 kb 3' of <i>IRF5</i> | 0.42             | $1.4 \times 10^{-35}$         | 0.0012                                          | NA <sup>  </sup>                                              |

<sup>\*</sup> Position of marker in the HG17 assembly of the human genome.

<sup>†</sup> Minor Allele Frequency.

<sup>‡</sup> Uncorrected *P* value for association of the indicated marker to *IRF5* mRNA levels in 233 CEPH EBV-transformed B cells (15).

<sup>§</sup> Association of the indicated marker under the model that rs10954213 fully explains all the variance in *IRF5* expression.

<sup>¶</sup> Association of the indicated marker under the model that rs10954213 and rs2004640 fully explain all the variance in *IRF5* expression.

<sup>||</sup> NA indicates that the association to *IRF5* expression cannot be calculated because it is statistically indistinguishable from the proposed model.
