# Supplementary material
Source: PubMed Central journal article supplement (PMC1871858)
Supplement: pnas_0701266104_6.pdf [file pnas_0701266104_6.pdf]

Table 8. *IRF5* expression analysis in 233 CEPH EBV cell lines

| <b>N*</b> | <b>rs2004640</b> | <b>rs10954213</b> | <b>rs10954214</b> | <b>rs2280714</b> | <b>Mean <i>IRF5</i> expression<sup>†</sup></b> |
|-----------|------------------|-------------------|-------------------|------------------|------------------------------------------------|
| 27        | G / G            | G / G             | C / C             | C / C            | 570.8                                          |
| 9         | T / G            | G / G             | C / T             | C / T            | 746.6                                          |
| 22        | G / G            | A / G             | C / T             | C / T            | 888.4                                          |
| 70        | T / G            | A / G             | C / T             | C / T            | 995.1                                          |
| 12        | T / T            | A / G             | T / T             | T / T            | 1071.4                                         |
| 6         | G / G            | A / A             | T / T             | T / T            | 1300.6                                         |
| 27        | T / G            | A / A             | T / T             | T / T            | 1360.2                                         |
| 40        | T / T            | A / A             | T / T             | T / T            | 1359.9                                         |

\* Number of individuals with genotypes at the indicated markers. Genotypes with less than five individuals are excluded.

† Mean expression value for individuals carrying the indicated genotypes.
