# Supplementary material
Source: PubMed Central journal article supplement (PMC1871858)
Supplement: pnas_0701266104_7.pdf [file pnas_0701266104_7.pdf]

Table 9. Association of *IRF5* region markers with *IRF5* expression in the HapMap CEU population.

| Chromosome | Marker     | Position <sup>†</sup> | MAF <sup>†</sup> | P <sup>‡</sup> | P conditional on rs10954213 and rs2004640 <sup>§</sup> |
|------------|------------|-----------------------|------------------|----------------|--------------------------------------------------------|
| 7          | rs13238831 | 128,070,432           | 0.19             | 0.34           | 1.00                                                   |
| 7          | rs1532222  | 128,070,907           | 0.26             | 0.67           | 1.00                                                   |
| 7          | rs7780972  | 128,073,124           | 0.10             | 0.65           | 1.00                                                   |
| 7          | rs9656375  | 128,075,202           | 0.28             | 0.37           | 1.00                                                   |
| 7          | rs10954211 | 128,075,393           | 0.26             | 0.47           | 0.10                                                   |
| 7          | rs4731523  | 128,084,238           | 0.19             | 1.00           | 0.41                                                   |
| 7          | rs7782976  | 128,086,942           | 0.27             | 0.23           | 1.00                                                   |
| 7          | rs6972002  | 128,093,690           | 0.24             | 0.56           | 1.00                                                   |
| 7          | rs6948542  | 128,101,474           | 0.26             | 0.83           | 0.84                                                   |
| 7          | rs7786945  | 128,102,425           | 0.26             | 0.46           | 1.00                                                   |
| 7          | rs6467218  | 128,102,916           | 0.28             | 0.99           | 1.00                                                   |
| 7          | rs7792282  | 128,103,530           | 0.27             | 0.77           | 1.00                                                   |
| 7          | rs1495461  | 128,105,702           | 0.22             | 0.46           | 0.92                                                   |
| 7          | rs960633   | 128,114,723           | 0.28             | 0.58           | 1.00                                                   |
| 7          | rs6968225  | 128,117,569           | 0.18             | 0.0036         | 1.00                                                   |
| 7          | rs729302   | 128,122,922           | 0.32             | 0.23           | 1.00                                                   |
| 7          | rs4728142  | 128,127,929           | 0.41             | 7.47E-06       | 0.84                                                   |
| 7          | rs2004640  | 128,132,263           | 0.49             | 8.72E-09       | -                                                      |
| 7          | rs752637   | 128,133,382           | 0.45             | 6.60E-10       | 1.00                                                   |
| 7          | rs6975315  | 128,136,447           | 0.02             | 0.71           | 0.43                                                   |
| 7          | rs7808907  | 128,138,046           | 0.47             | 1.00           | 0.86                                                   |
| 7          | rs2070197  | 128,142,962           | 0.09             | 0.11           | 0.20                                                   |
| 7          | rs10954213 | 128,143,389           | 0.43             | 2.83E-09       | -                                                      |
| 7          | rs11770589 | 128,143,450           | 0.48             | 1.04E-06       | 1.00                                                   |
| 7          | rs10954214 | 128,143,595           | 0.37             | 1.19E-10       | NA                                                     |
| 7          | rs13242262 | 128,145,326           | 0.50             | 6.82E-09       | NA                                                     |
| 7          | rs10488630 | 128,147,910           | 0.28             | 0.00100        | 0.63                                                   |
| 7          | rs10488631 | 128,148,145           | 0.16             | 0.14           | 1.00                                                   |
| 7          | rs2280714  | 128,148,687           | 0.42             | 2.75E-11       | NA                                                     |
| 7          | rs10229001 | 128,153,359           | 0.45             | 6.77E-09       | NA                                                     |
| 7          | rs1495458  | 128,156,954           | 0.03             | 0.19           | 0.55                                                   |
| 7          | rs2172876  | 128,157,254           | 0.38             | 9.30E-07       | 0.12                                                   |
| 7          | rs6957529  | 128,159,422           | 0.08             | 0.06           | 0.75                                                   |
| 7          | rs7385716  | 128,159,556           | 0.47             | 1.30E-08       | NA                                                     |
| 7          | rs4731535  | 128,159,929           | 0.38             | 3.95E-07       | 0.12                                                   |
| 7          | rs8043     | 128,161,346           | 0.38             | 3.95E-07       | 0.12                                                   |
| 7          | rs1258897  | 128,162,375           | 0.01             | NA             | NA                                                     |
| 7          | rs1874332  | 128,168,575           | 0.38             | 1.00           | 0.12                                                   |
| 7          | rs2293492  | 128,169,028           | 0.08             | 0.06           | 0.75                                                   |
| 7          | rs12531711 | 128,171,428           | 0.17             | 0.16           | 0.06                                                   |
| 7          | rs17338998 | 128,172,521           | 0.16             | 0.27           | 0.03                                                   |
| 7          | rs2272347  | 128,173,377           | 0.47             | 3.69E-09       | NA                                                     |
| 7          | rs3817555  | 128,173,483           | 0.04             | 0.46           | NA                                                     |
| 7          | rs7789423  | 128,175,166           | 0.42             | 2.75E-11       | NA                                                     |
| 7          | rs6948928  | 128,177,059           | 0.42             | 2.75E-11       | NA                                                     |
| 7          | rs12534421 | 128,178,035           | 0.17             | 0.16           | 0.06                                                   |
| 7          | rs12535158 | 128,178,981           | 0.17             | 0.16           | 0.06                                                   |
| 7          | rs12669885 | 128,179,251           | 0.04             | 0.46           | NA                                                     |
| 7          | rs1154330  | 128,179,750           | 0.20             | 0.00619        | 0.36                                                   |
| 7          | rs17339221 | 128,179,876           | 0.20             | 0.01           | 0.36                                                   |
| 7          | rs2290231  | 128,180,519           | 0.04             | 0.46           | NA                                                     |
| 7          | rs11770317 | 128,183,433           | 0.38             | 9.10E-07       | 0.12                                                   |
| 7          | rs6969930  | 128,184,275           | 0.46             | 3.69E-09       | NA                                                     |
| 7          | rs2305323  | 128,187,680           | 0.28             | 0.000998       | 1.00                                                   |
| 7          | rs3958094  | 128,189,225           | 0.28             | 0.000998       | 0.63                                                   |

|   |            |             |      |          |      |
|---|------------|-------------|------|----------|------|
| 7 | rs7807018  | 128,194,146 | 0.45 | 9.99E-09 | NA   |
| 7 | rs2305324  | 128,195,184 | 0.36 | 3.69E-06 | 0.15 |
| 7 | rs11768572 | 128,199,250 | 0.27 | 0.00281  | 1.00 |
| 7 | rs2305325  | 128,208,798 | 0.36 | 3.69E-06 | 0.15 |
| 7 | rs6965542  | 128,209,876 | 0.48 | 1.73E-08 | NA   |
| 7 | rs3857852  | 128,211,235 | 0.42 | 6.28E-11 | NA   |
| 7 | rs12539476 | 128,211,441 | 0.17 | 0.16     | 0.06 |
| 7 | rs17424179 | 128,211,953 | 0.03 | 0.57     | 0.53 |
| 7 | rs12155080 | 128,212,697 | 0.46 | 3.69E-09 | NA   |
| 7 | rs13236009 | 128,217,131 | 0.17 | 0.19     | 0.05 |
| 7 | rs13221560 | 128,217,133 | 0.39 | 2.07E-10 | NA   |
| 7 | rs10239340 | 128,222,468 | 0.46 | 3.69E-09 | NA   |
| 7 | rs11762968 | 128,224,922 | 0.38 | 3.95E-07 | 0.12 |
| 7 | rs9649520  | 128,226,603 | 0.34 | 9.03E-06 | 0.16 |
| 7 | rs921403   | 128,230,682 | 0.43 | 8.49E-11 | 0.94 |
| 7 | rs4731541  | 128,232,194 | 0.45 | 8.15E-08 | 0.94 |
| 7 | rs1839600  | 128,236,681 | 0.02 | 0.34     | 0.03 |
| 7 | rs3807301  | 128,236,970 | 0.28 | 0.00416  | 0.84 |
| 7 | rs10279821 | 128,237,505 | 0.41 | 2.46E-10 | 0.91 |
| 7 | rs10156169 | 128,238,529 | 0.42 | 1.80E-10 | 0.66 |
| 7 | rs11767238 | 128,240,296 | 0.29 | 0.00     | 0.84 |
| 7 | rs17424602 | 128,241,898 | 0.15 | 0.33     | 0.02 |
| 7 | rs2167273  | 128,243,371 | 0.36 | 3.69E-06 | 0.15 |
| 7 | rs6960994  | 128,246,615 | 0.26 | 1.00     | 0.33 |
| 7 | rs6961014  | 128,246,668 | 0.25 | 0.00026  | 0.26 |
| 7 | rs6980198  | 128,247,954 | 0.02 | 0.71     | 0.44 |
| 7 | rs3807300  | 128,248,049 | 0.02 | 0.32     | 0.97 |
| 7 | rs2242028  | 128,248,934 | 0.25 | 0.00069  | 0.35 |
| 7 | rs13239597 | 128,249,941 | 0.17 | 0.16     | 0.06 |
| 7 | rs13246321 | 128,255,289 | 0.17 | 0.19     | 0.06 |
| 7 | rs17424921 | 128,262,080 | 0.17 | 0.05     | 0.34 |
| 7 | rs17340351 | 128,262,755 | 0.18 | 0.13     | 0.02 |
| 7 | rs17167079 | 128,263,129 | 0.02 | 0.11     | 0.97 |
| 7 | rs1901198  | 128,263,747 | 0.38 | 1.91E-06 | 0.04 |
| 7 | rs7794772  | 128,264,168 | 0.02 | 0.32     | 0.97 |
| 7 | rs7795214  | 128,264,418 | 0.03 | 0.32     | 0.97 |
| 7 | rs13222967 | 128,265,186 | 0.27 | 0.18     | 0.49 |
| 7 | rs7783840  | 128,265,657 | 0.26 | 0.12     | 0.21 |
| 7 | rs12537496 | 128,266,826 | 0.23 | 0.01     | 1.00 |
| 7 | rs12536719 | 128,271,698 | 0.15 | 0.19     | 0.53 |
| 7 | rs12537284 | 128,271,864 | 0.16 | 0.12     | 0.04 |
| 7 | rs12537264 | 128,271,923 | 0.18 | 1.00     | 1.00 |
| 7 | rs17340542 | 128,274,003 | 0.17 | 0.16     | 1.00 |
| 7 | rs17425212 | 128,275,682 | 0.18 | 0.16     | 0.21 |
| 7 | rs17340646 | 128,276,472 | 0.26 | 1.00     | 0.03 |
| 7 | rs13227095 | 128,277,901 | 0.25 | 0.00176  | 0.10 |
| 7 | rs12706862 | 128,279,283 | 0.39 | 0.00163  | 1.00 |
| 7 | rs6959557  | 128,279,508 | 0.37 | 0.00595  | 1.00 |
| 7 | rs6959965  | 128,279,680 | 0.37 | 0.01     | 1.00 |
| 7 | rs7458937  | 128,282,712 | 0.32 | 0.00114  | 1.00 |
| 7 | rs2084654  | 128,283,086 | 0.38 | 0.00595  | 0.13 |
| 7 | rs4731545  | 128,286,220 | 0.41 | 0.39     | 0.09 |

<sup>†</sup> Position of the variant in the HG17 assembly of the human genome.

<sup>‡</sup> Minor Allele Frequency.

<sup>‡</sup> Nominal P value for association of the variant to *IRF5* expression levels in CEPH EBV-transformed B cells from the HapMap CEU population. (Morley et al data; reference 11,12)

<sup>§</sup> Association of the indicated marker under the model that rs10954213 and rs2004640 fully explain all the variance in *IRF5* expression.
