# Supplementary material
Source: PubMed Central journal article supplement (PMC1871858)
Supplement: pnas_0701266104_9.pdf [file pnas_0701266104_9.pdf]

Table 11. Single marker association results case/control cohorts from Sweden and the U.S./U.K.

Single marker association results in 338 SLE cases and 363 controls from Sweden.

|            | Associated Allele | Case Frequency | Control Frequency | Total No. of Case Alleles | Total No. of Control Alleles | <i>P</i>             | OR   | 95% CI    |
|------------|-------------------|----------------|-------------------|---------------------------|------------------------------|----------------------|------|-----------|
| rs2004640  | T                 | 0.644          | 0.527             | 654                       | 714                          | $1.1 \times 10^{-5}$ | 1.62 | 1.30-2.01 |
| rs2070197  | C                 | 0.222          | 0.122             | 604                       | 710                          | $1.9 \times 10^{-6}$ | 2.04 | 1.52-2.74 |
| rs10954213 | A                 | 0.735          | 0.658             | 652                       | 716                          | 0.0021               | 1.44 | 1.14-1.81 |

Single marker association results in 768 SLE cases and 1439 controls from the U.S. and U.K.

| Marker     | Associated Allele | Case Frequency | Control Frequency | Total No. of Case Alleles | Total No. of Control Alleles | <i>P</i>             | OR   | 95% CI    |
|------------|-------------------|----------------|-------------------|---------------------------|------------------------------|----------------------|------|-----------|
| rs2004640  | T                 | 0.589          | 0.512             | 1520                      | 2850                         | $9.7 \times 10^{-7}$ | 1.37 | 1.21-1.55 |
| rs2070197  | C                 | 0.175          | 0.116             | 1522                      | 2818                         | $6.8 \times 10^{-8}$ | 1.62 | 1.36-1.92 |
| rs10954213 | A                 | 0.672          | 0.612             | 1520                      | 2878                         | $9.1 \times 10^{-5}$ | 1.30 | 1.14-1.48 |
