# Supplementary material
Source: PubMed Central journal article supplement (PMC1871858)
Supplement: pnas_0701266104_10.pdf [file pnas_0701266104_10.pdf]

Table 12. *IRF5* genotype frequencies in SLE cases and controls

| U.S. and U.K. Cases and controls |                |                        |          |       |                 |          |                        |
|----------------------------------|----------------|------------------------|----------|-------|-----------------|----------|------------------------|
| Genotype <sup>*</sup>            | Cases          |                        | Controls |       | OR <sup>§</sup> | $\chi^2$ | P                      |
|                                  | N <sup>†</sup> | Frequency <sup>‡</sup> | N        | Freq  |                 |          |                        |
| 1 1                              | 26             | 0.028                  | 14       | 0.010 | 2.96            | 11.5     | 0.00068                |
| 1 2                              | 108            | 0.117                  | 115      | 0.080 | 1.53            | 9.2      | 0.00249                |
| 1 3                              | 17             | 0.018                  | 9        | 0.006 | 2.99            | 7.7      | 0.00561                |
| 1 4                              | 89             | 0.097                  | 124      | 0.086 | 1.13            | 0.8      | 0.38648                |
| 1 5                              | 41             | 0.045                  | 51       | 0.035 | 1.27            | 1.2      | 0.26741                |
| 2 2                              | 132            | 0.143                  | 187      | 0.130 | 1.12            | 0.9      | 0.35655                |
| 2 3                              | 32             | 0.035                  | 52       | 0.036 | 0.96            | 0.0      | 0.85803                |
| 2 4                              | 207            | 0.225                  | 359      | 0.249 | 0.87            | 1.9      | 0.17033                |
| 2 5                              | 83             | 0.090                  | 144      | 0.100 | 0.89            | 0.6      | 0.42371                |
| 3 3                              | 2              | 0.002                  | 1        | 0.001 | 3.13            | 1.0      | 0.32719                |
| 3 4                              | 20             | 0.022                  | 46       | 0.032 | 0.67            | 2.2      | 0.14073                |
| 3 5                              | 0              | 0.000                  | 0        | 0.000 |                 |          |                        |
| 4 4                              | 87             | 0.094                  | 162      | 0.113 | 0.82            | 2.0      | 0.16259                |
| 4 5                              | 65             | 0.071                  | 156      | 0.108 | 0.62            | 9.5      | 0.00209                |
| 5 5                              | 12             | 0.013                  | 19       | 0.013 | 0.99            | 0.0      | 0.97477                |
| Total                            | 921            |                        | 1439     |       |                 |          |                        |
| 1 X                              | 281            | 0.305                  | 313      | 0.218 | 1.58            | 22.9     | 1.7 x 10 <sup>-6</sup> |
| 2 X                              | 562            | 0.610                  | 857      | 0.596 | 1.06            | 0.5      | 0.47862                |
| 3 X                              | 71             | 0.077                  | 108      | 0.075 | 1.03            | 0.0      | 0.85585                |
| 4 X                              | 468            | 0.508                  | 847      | 0.589 | 0.72            | 14.7     | 0.00012                |
| 5 X                              | 201            | 0.218                  | 370      | 0.257 | 0.81            | 4.6      | 0.03142                |
| Swedish Cases and controls       |                |                        |          |       |                 |          |                        |
| Genotype <sup>*</sup>            | Cases          |                        | Controls |       | OR <sup>§</sup> | $\chi^2$ | P                      |
|                                  | N <sup>†</sup> | Frequency <sup>‡</sup> | N        | Freq  |                 |          |                        |
| 1 1                              | 21             | 0.065                  | 10       | 0.028 | 2.36            | 5.1      | 0.024                  |
| 1 2                              | 45             | 0.139                  | 24       | 0.068 | 2.20            | 9.1      | 0.0025                 |
| 1 3                              | 7              | 0.022                  | 3        | 0.009 | 2.56            | 2.0      | 0.161                  |
| 1 4                              | 37             | 0.114                  | 31       | 0.088 | 1.33            | 1.2      | 0.264                  |
| 1 5                              | 20             | 0.062                  | 14       | 0.040 | 1.58            | 1.7      | 0.195                  |
| 2 2                              | 47             | 0.145                  | 44       | 0.125 | 1.18            | 0.6      | 0.454                  |
| 2 3                              | 12             | 0.037                  | 9        | 0.026 | 1.46            | 0.7      | 0.394                  |
| 2 4                              | 53             | 0.164                  | 82       | 0.234 | 0.64            | 5.2      | 0.023                  |
| 2 5                              | 36             | 0.111                  | 41       | 0.117 | 0.95            | 0.1      | 0.816                  |
| 3 3                              | 0              | 0.000                  | 0        | 0.000 |                 |          |                        |
| 3 4                              | 6              | 0.019                  | 14       | 0.040 | 0.45            | 2.7      | 0.102                  |
| 3 5                              | 1              | 0.003                  | 9        | 0.026 | 0.12            | 5.9      | 0.015                  |
| 4 4                              | 17             | 0.052                  | 23       | 0.066 | 0.79            | 0.5      | 0.473                  |
| 4 5                              | 15             | 0.046                  | 32       | 0.091 | 0.48            | 5.2      | 0.022                  |
| 5 5                              | 7              | 0.022                  | 15       | 0.043 | 0.49            | 2.4      | 0.122                  |
| Total                            | 324            |                        | 351      |       |                 |          |                        |
| 1 X                              | 130            | 0.401                  | 82       | 0.234 | 2.20            | 22.0     | 2.8 x 10 <sup>-6</sup> |
| 2 X                              | 193            | 0.596                  | 200      | 0.570 | 1.11            | 0.5      | 0.496                  |
| 3 X                              | 26             | 0.080                  | 35       | 0.100 | 0.79            | 0.8      | 0.378                  |
| 4 X                              | 128            | 0.395                  | 182      | 0.519 | 0.61            | 10.3     | 0.0013                 |
| 5 X                              | 79             | 0.244                  | 111      | 0.316 | 0.70            | 4.4      | 0.037                  |

\* Genotype of the *IRF5* haplotypes defined in Table 2.

† Number of individuals with the indicated genotype.

‡ Genotype frequency.

§ Odds ratio.
