# Supplementary material
Source: PubMed Central journal article supplement (PMC1871858)
Supplement: pnas_0701266104_12.pdf [file pnas_0701266104_12.pdf]

Table 14. Frequency of *IRF5* haplotypes in representative world populations from the Human Genome Diversity Project.

|                      |               | N <sup>*</sup> | Haplotype <sup>†</sup> |      |      |      |      |
|----------------------|---------------|----------------|------------------------|------|------|------|------|
|                      |               |                | 1                      | 2    | 3    | 4    | 5    |
| Africa               | Biaka Pygmies | 72             | -                      | 0.40 | -    | 0.44 | 0.15 |
|                      | Mbuti Pygmies | 30             | -                      | 0.70 | -    | 0.23 | 0.07 |
|                      | Mandenka      | 48             | -                      | 0.38 | -    | 0.54 | 0.08 |
|                      | Yoruba        | 50             | -                      | 0.28 | -    | 0.52 | 0.20 |
|                      | Bantu         | 38             | -                      | 0.39 | 0.03 | 0.45 | 0.13 |
|                      | San           | 14             | -                      | 0.21 | 0.29 | 0.14 | 0.36 |
| America              | Colombian     | 22             | 0.09                   | -    | -    | 0.77 | 0.14 |
|                      | Karitiana     | 48             | 0.02                   | -    | -    | 0.90 | 0.08 |
|                      | Maya          | 50             | 0.34                   | 0.10 | -    | 0.44 | 0.12 |
|                      | Pima          | 50             | 0.36                   | 0.02 | -    | 0.50 | 0.12 |
|                      | Surui         | 42             | -                      | -    | -    | 1.00 | -    |
| Central / South Asia | Balochi       | 50             | 0.04                   | 0.38 | 0.06 | 0.32 | 0.20 |
|                      | Brahui        | 50             | 0.30                   | 0.16 | 0.08 | 0.16 | 0.30 |
|                      | Burusho       | 50             | 0.18                   | 0.32 | 0.14 | 0.30 | 0.06 |
|                      | Hazara        | 50             | 0.02                   | 0.38 | 0.06 | 0.30 | 0.24 |
|                      | Kalash        | 50             | 0.04                   | 0.32 | 0.04 | 0.56 | 0.04 |
|                      | Makrani       | 50             | 0.14                   | 0.36 | 0.04 | 0.24 | 0.22 |
|                      | Pathan        | 49             | 0.14                   | 0.25 | 0.12 | 0.27 | 0.20 |
|                      | Sindhi        | 49             | 0.20                   | 0.37 | 0.06 | 0.31 | 0.04 |
|                      | Uyгур         | 20             | 0.10                   | 0.35 | -    | 0.35 | 0.20 |
| East Asia            | Cambodian     | 20             | -                      | 0.30 | 0.25 | 0.30 | 0.15 |
|                      | Dai           | 18             | -                      | -    | 0.11 | 0.56 | 0.33 |
|                      | Daur          | 20             | -                      | 0.25 | -    | 0.60 | 0.15 |
|                      | Han           | 90             | -                      | 0.18 | 0.06 | 0.33 | 0.43 |
|                      | Hezhen        | 20             | -                      | 0.25 | 0.05 | 0.50 | 0.20 |
|                      | Japanese      | 60             | 0.02                   | 0.23 | 0.07 | 0.47 | 0.22 |
|                      | Lahu          | 20             | -                      | 0.10 | 0.15 | 0.35 | 0.40 |
|                      | Miaozu        | 20             | -                      | 0.10 | 0.15 | 0.35 | 0.40 |
|                      | Mongola       | 18             | -                      | 0.17 | 0.06 | 0.33 | 0.44 |
|                      | Naxi          | 20             | -                      | 0.30 | -    | 0.35 | 0.35 |
|                      | Oroqen        | 20             | 0.05                   | 0.35 | 0.05 | 0.50 | 0.05 |
|                      | She           | 20             | -                      | 0.25 | 0.05 | 0.25 | 0.45 |
|                      | Tu            | 20             | 0.05                   | 0.45 | 0.10 | 0.20 | 0.20 |
|                      | Tujia         | 18             | -                      | 0.17 | 0.17 | 0.33 | 0.33 |
|                      | Xibo          | 18             | -                      | 0.22 | 0.17 | 0.39 | 0.22 |
| Yakut                | 50            | -              | 0.26                   | 0.06 | 0.56 | 0.12 |      |
| Yizu                 | 20            | -              | 0.35                   | 0.10 | 0.30 | 0.25 |      |
| Europe               | Adygei        | 30             | 0.23                   | 0.33 | 0.03 | 0.27 | 0.13 |
|                      | French        | 40             | 0.08                   | 0.25 | 0.13 | 0.45 | 0.10 |
|                      | French Basque | 42             | 0.24                   | 0.26 | 0.05 | 0.17 | 0.29 |
|                      | North Italian | 26             | 0.08                   | 0.42 | 0.04 | 0.31 | 0.15 |
|                      | Orcadian      | 30             | 0.13                   | 0.43 | -    | 0.30 | 0.13 |
|                      | Russian       | 50             | 0.12                   | 0.30 | 0.06 | 0.36 | 0.16 |
|                      | Sardinian     | 52             | 0.04                   | 0.38 | 0.08 | 0.31 | 0.19 |
|                      | Tuscan        | 14             | -                      | 0.57 | 0.07 | 0.14 | 0.21 |
| Middle East          | Bedouin       | 98             | 0.10                   | 0.40 | 0.10 | 0.34 | 0.06 |
|                      | Druze         | 94             | 0.17                   | 0.38 | 0.15 | 0.26 | 0.04 |
|                      | Mozabite      | 58             | 0.02                   | 0.40 | 0.03 | 0.36 | 0.19 |
|                      | 10            |                |                        |      |      |      |      |
| Oceania              | Palestinian   | 0              | 0.20                   | 0.39 | 0.13 | 0.22 | 0.06 |
|                      | Melanesian    | 40             | -                      | 0.10 | -    | 0.75 | 0.15 |
|                      | Papuan        | 34             | -                      | 0.03 | 0.12 | 0.50 | 0.35 |

N = number of chromosomes. Haplotypes greater than 0.01 frequency were analyzed.

<sup>†</sup> Phased haplotypes of *IRF5* at rs2004640, rs2070197, rs10954213. 1=TCA, 2=TTA, 3=TTG, 4=GTG, 5=GTA.
